# Supplementary material
Source: MDPI journal article supplement (https://www.mdpi.com/2071-1050/15/18/13829)
Supplement: s1 [file s1]

## **Accumulated carbon fractions in tropical sandy soils and their effects on fertility and grain yield in an integrated crop-livestock system**

Deyvison de Asevedo Soaresa, Bianca Midori Souza Sekiyac, Viviane Cristina Modestob, Allan Hisashi Nakaob, Leandro Alves Freitasb, Isabela Malaquias Dalto de Souzaab, João Henrique Silva da Luza, Fernando Shintate Galindoc, Gelci Carlos Lupatinic, Gustavo Pavan Mateusd, Carolina dos Santos Batista Boninic, Cristiana Andrighettoc, Iêda de Carvalho Mendese, Paulo Sergio Pavinatoa, Marcelo Andreottib.

<sup>a</sup>Department of Soil Science, Luiz de Queiroz College of Agriculture, University of São Paulo, Piracicaba 13418900, Brazil

<sup>b</sup>Department of Plant Health, Rural Engineering and Soils, São Paulo State University “Julio de Mesquita Filho”, Ilha Solteira 15385-000, Brazil

<sup>c</sup>College of Agronomic and Technological Sciences, São Paulo State University “Julio de Mesquita Filho”, Dracena 17900-000, Brazil

<sup>d</sup>São Paulo Agency of Agribusiness Technology (APTA), Andradina 16900-970, Brazil

<sup>e</sup>Embrapa Cerrados, BR020, Km 18, 73310-970 Planaltina, DF, Brazil

### **Corresponding authors:**

[deyvison.a.soares@gmail.com](mailto:deyvison.a.soares@gmail.com) (D.d.A.S.)

[marcelo.andreotti@unesp.br](mailto:marcelo.andreotti@unesp.br) (M.A.)

Supplementary Material

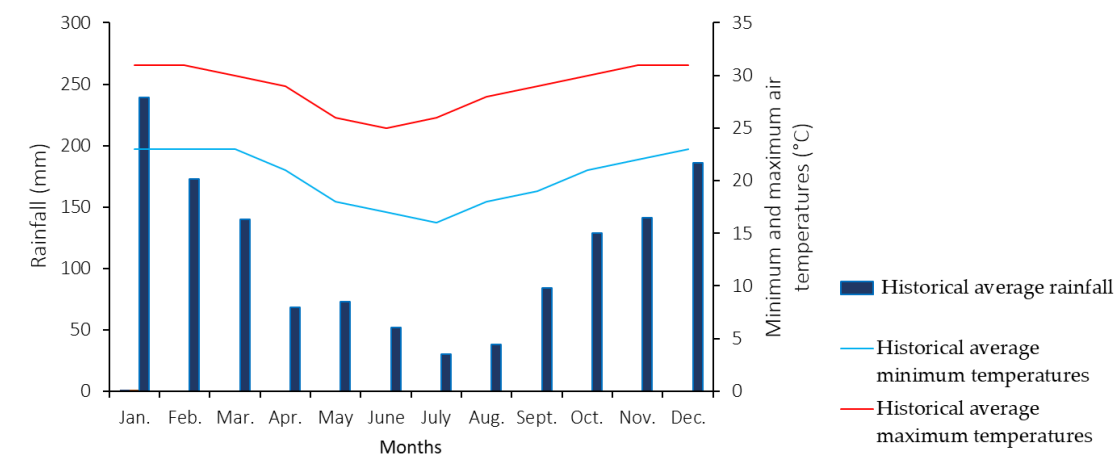

**Supplementary Fig. S1.** Historical climate data (1992-2022) of the experimental site. Caiuá, SP, Brazil.

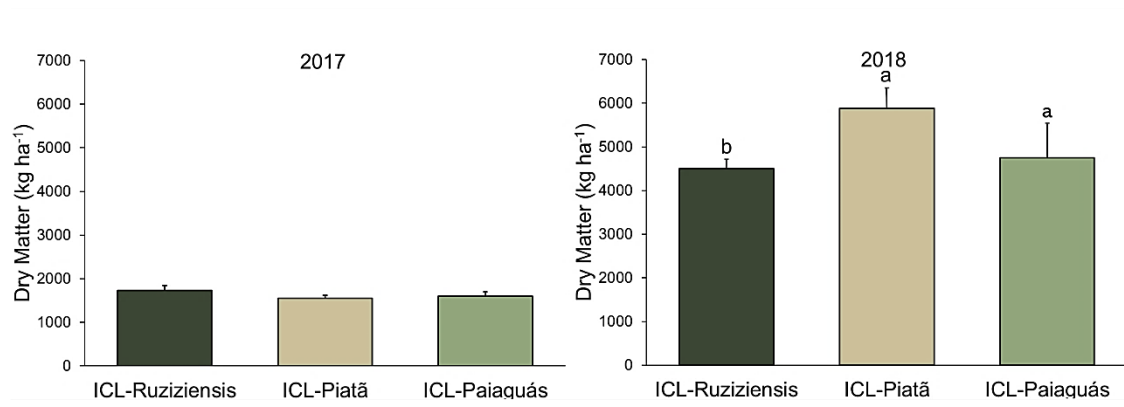

**Supplementary Fig. S2.** Dry matter of the aerial part of *Urochloa ruziziensis* (ICL-Ruziziensis), *U. brizantha* cv. Piatã (ICL-Piatã) and *U. brizantha* cv. Paiaguás (ICL-Paiaguás). Different letters denote significant difference between treatments (Tukey,  $P \leq 0.05$ ).

1

**Supplementary Table S1.** Photoperiod at Caiuá, SP, Brazil.

| Period                                 | Month |      |      |      |      |      |      |      |       |      |      |      |
|----------------------------------------|-------|------|------|------|------|------|------|------|-------|------|------|------|
|                                        | Jan.  | Feb. | Mar. | Apr. | May  | June | July | Aug. | Sept. | Oct. | Nov. | Dec. |
| <u>Photoperiod, h day<sup>-1</sup></u> |       |      |      |      |      |      |      |      |       |      |      |      |
| Monthly average for 2005 to 2019       | 13.4  | 13.1 | 12.5 | 11.9 | 11.1 | 10.7 | 10.7 | 11.0 | 11.7  | 12.3 | 13.0 | 13.3 |

2

3

**Supplementary Table S2.** Information on the cultivar, sowing date, spacing between rows, sowing density, fertilization, top dressing date and date of harvest (corn and soybean) or management for the palisadegrass used in the cropping systems from 2016/17, 2017/18 and 2018/19.

| Crop                              | Cultivar                                                                                      | Sowing date                  | Spacing<br>between<br>rows       | Plant<br>Density                                   | Basic<br>fertilization                                                           | Top<br>dressing date                                                              | Top<br>dressing                                                                                  | Date of<br>harvest/<br>management            |
|-----------------------------------|-----------------------------------------------------------------------------------------------|------------------------------|----------------------------------|----------------------------------------------------|----------------------------------------------------------------------------------|-----------------------------------------------------------------------------------|--------------------------------------------------------------------------------------------------|----------------------------------------------|
| Corn<br>(Off-season)              | DKB 390                                                                                       | 08 to 10 Mar.<br>2016        | 0.90 m                           | 6 seeds m <sup>-1</sup>                            | 24 kg N ha <sup>-1</sup><br>84 kg P ha <sup>-1</sup><br>48 kg K ha <sup>-1</sup> | 09 Apr. 2016                                                                      | 46 kg N ha <sup>-1</sup><br>46 kg K ha <sup>-1</sup>                                             | August 2016                                  |
| Corn<br>(Off-season)              | DKB 177                                                                                       | 15 to 16 Mar.<br>2017        | 0.90 m                           | 6 seeds m <sup>-1</sup>                            | 24 kg N ha <sup>-1</sup><br>84 kg P ha <sup>-1</sup><br>48 kg K ha <sup>-1</sup> | 15 Apr. 2016                                                                      | 48 kg N ha <sup>-1</sup><br>35 kg K ha <sup>-1</sup>                                             | July 2017                                    |
| Corn<br>(Off-season)              | DKB 177                                                                                       | 04 to 05 Mar.<br>2018        | 0.90 m                           | 6 seeds m <sup>-1</sup>                            | 24 kg N ha <sup>-1</sup><br>84 kg P ha <sup>-1</sup><br>48 kg K ha <sup>-1</sup> | 07 Apr. 2016                                                                      | 46 kg N ha <sup>-1</sup><br>46 kg K ha <sup>-1</sup>                                             | July 2018                                    |
| Palisade<br>grass<br>(Off-season) | <i>U. brizantha</i><br>(BRS Paiaguás<br>and BRS Piatã)<br>and <i>U.</i><br><i>ruziziensis</i> | Simultaneously<br>with maize | <i>Between the<br/>corn rows</i> | 5 kg ha <sup>-1</sup><br>(100% seed<br>viability). | -                                                                                | half the amount<br>applied in<br>November and half<br>in January of each<br>year. | 72 kg N ha <sup>-1</sup><br>year <sup>-1</sup><br>24 kg K ha <sup>-1</sup><br>year <sup>-1</sup> | 07 Oct. 2016<br>05 Oct. 2017<br>17 Oct. 2018 |
| Soybean<br>(Season)               | cv. TMG 7063                                                                                  | 04 to 05 Nov.<br>2016        | 0.45 m                           | 14 seeds m <sup>-1</sup>                           | 14 kg N ha <sup>-1</sup>                                                         | -                                                                                 | -                                                                                                | 13 Mar. 2017                                 |

|                     |              |                       |        |                          |                                                                                  |   |              |
|---------------------|--------------|-----------------------|--------|--------------------------|----------------------------------------------------------------------------------|---|--------------|
|                     |              |                       |        |                          | 100 kg P<br>ha <sup>-1</sup>                                                     |   |              |
|                     |              |                       |        |                          | 34 kg K ha <sup>-1</sup>                                                         |   |              |
| Soybean<br>(Season) | cv. TMG 7063 | 23 to 24 Oct.<br>2017 | 0.45 m | 19 seeds m <sup>-1</sup> | 80 kg N ha <sup>-1</sup><br>60 kg P ha <sup>-1</sup><br>95 kg K ha <sup>-1</sup> | - | 26 Feb. 2018 |
| Soybean<br>(Season) | cv. TMG 7063 | 02 to 03 Nov.<br>2018 | 0.45 m | 19 seeds m <sup>-1</sup> | 80 kg N ha <sup>-1</sup><br>60 kg P ha <sup>-1</sup><br>95 kg K ha <sup>-1</sup> | - | 25 Feb. 2019 |
